# Supplementary figures and images for: Preclinical targeting of aggressive T-cell malignancies using anti-CD5 chimeric antigen receptor
Source: PubMed Central journal article supplement — Leukemia. 2017 Feb 10;31(10):2151–60. doi: 10.1038/leu.2017.8 (PMC5629371; doi:10.1038/leu.2017.8), 2017-02-10

# Supplementary Figure 1: Cell line phenotypes

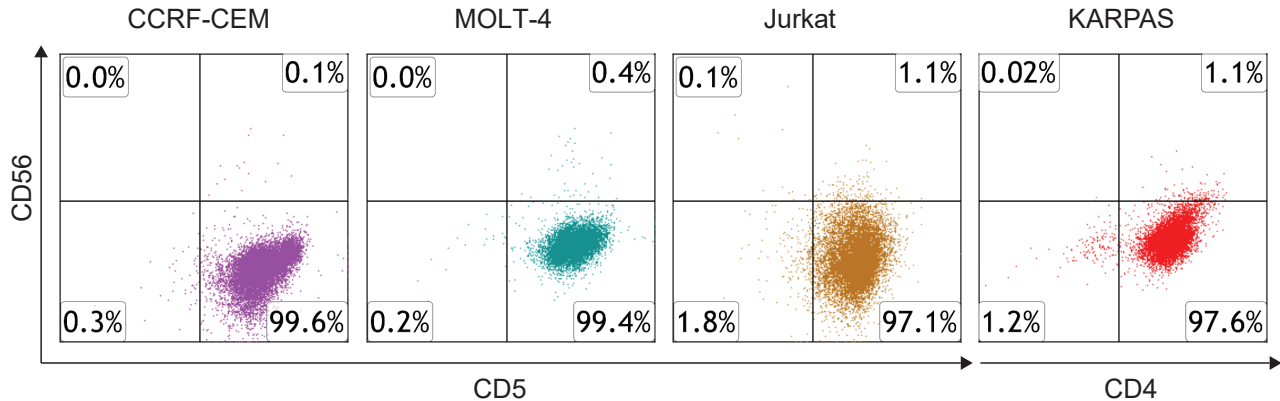

Supplement: leu20178x4.pdf [file leu20178x4.pdf]

## Supplementary Figure 2: Specific cytotoxicity assays

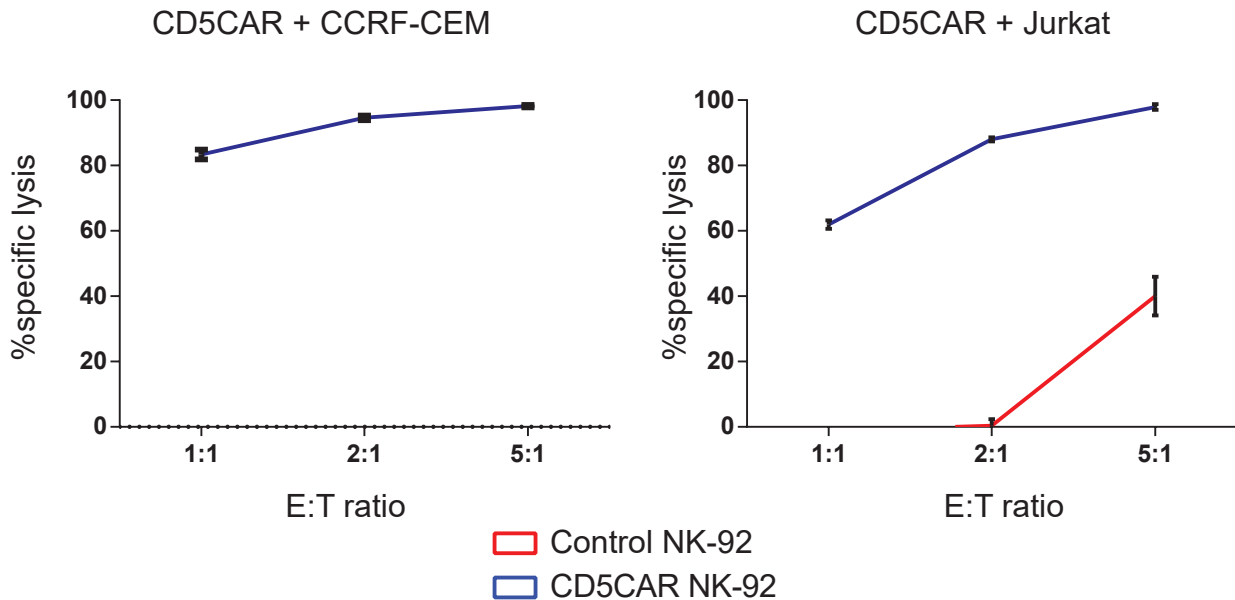

Supplement: leu20178x5.pdf [file leu20178x5.pdf]

Supplementary Figure 3 Primary human sample phenotypes

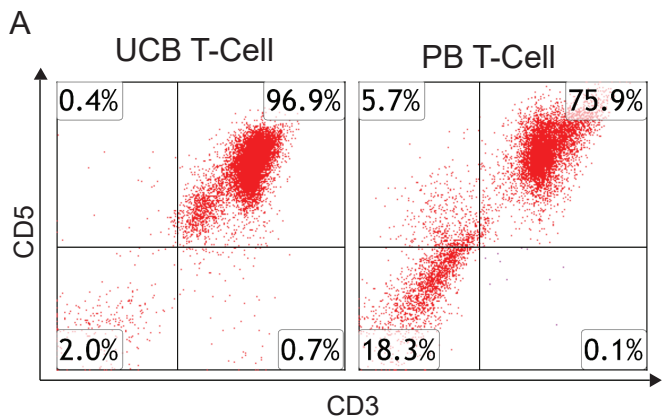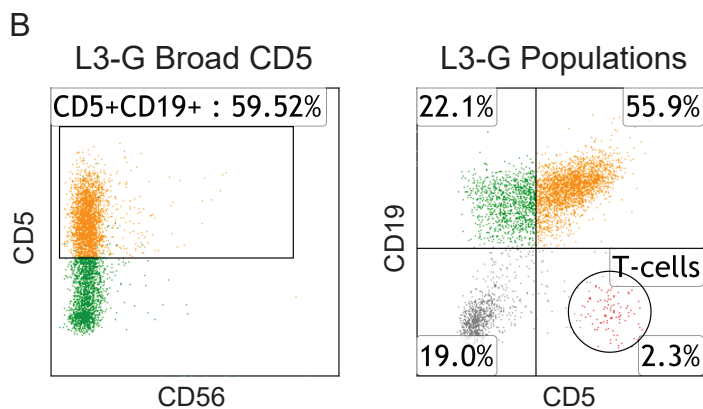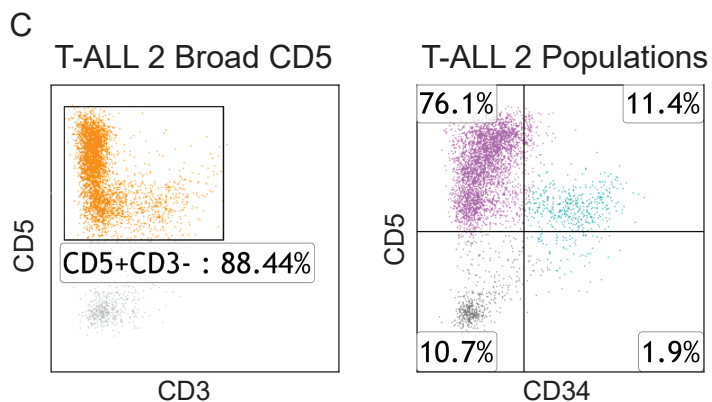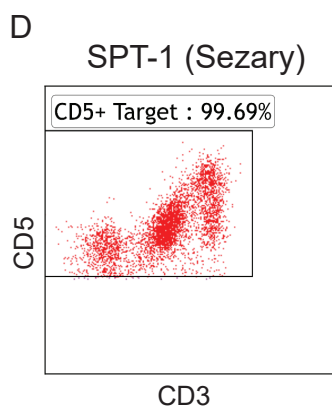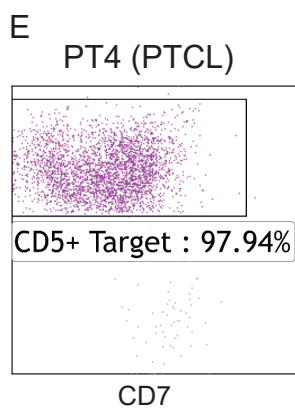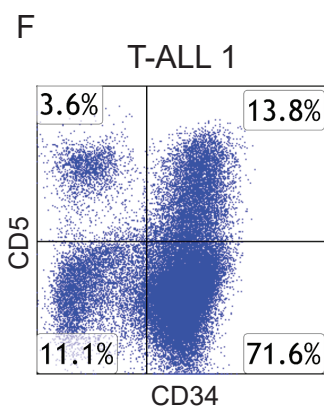

Supplement: leu20178x6.pdf [file leu20178x6.pdf]

Supplementary Figure 4:  
T-ALL 1 Co-culture

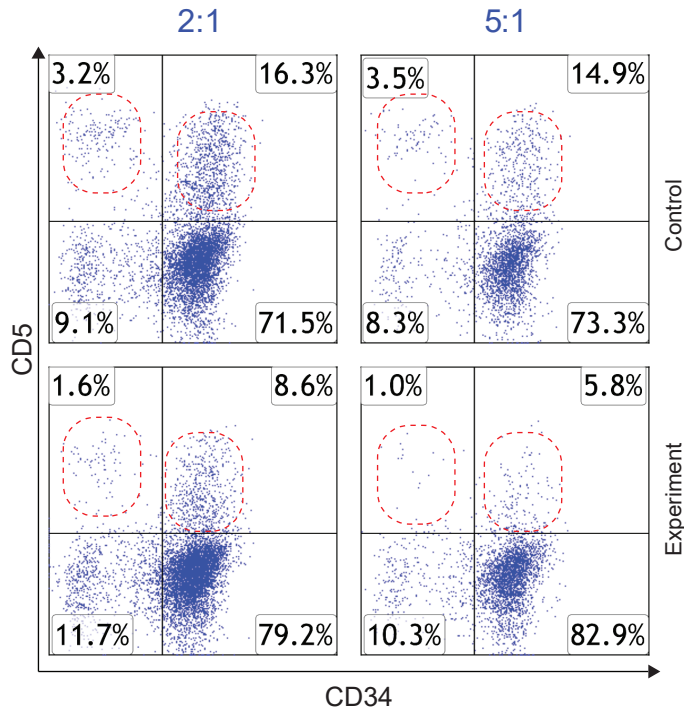

Supplement: leu20178x7.pdf [file leu20178x7.pdf]

Supplementary Figure 5: CCRF-CEM Dose-dependency treatment

A

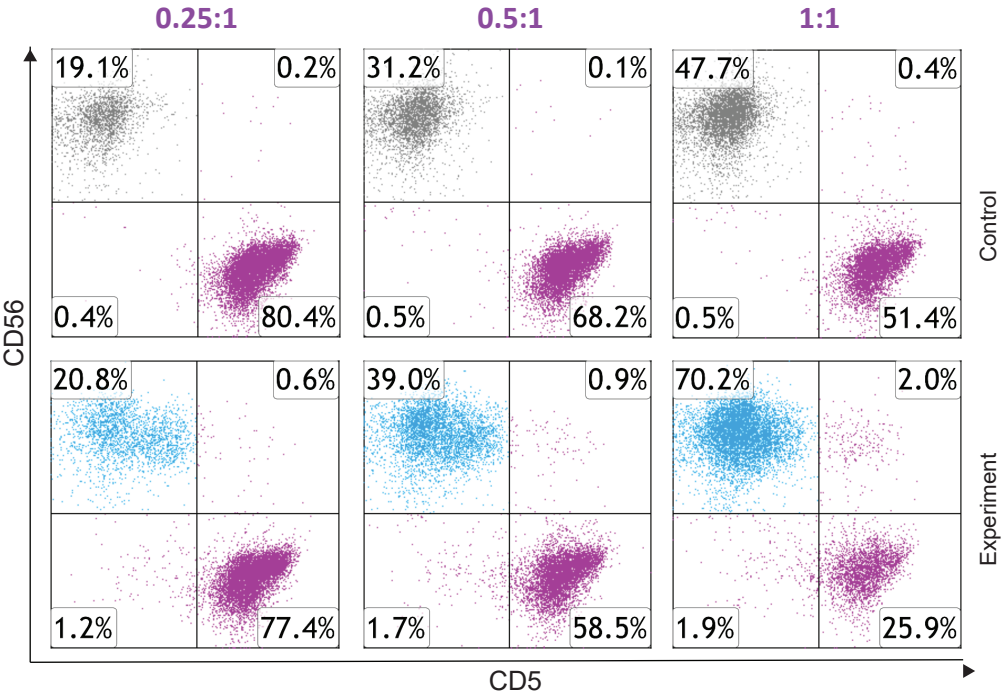

B

CCRF-CEM Dose response

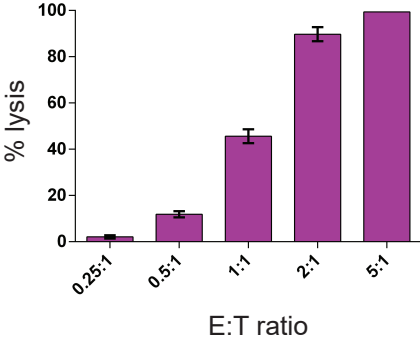

Supplement: leu20178x8.pdf [file leu20178x8.pdf]
